# Supplementary material
Source: PubMed Central journal article supplement (PMC4681593)

Supplemental Figure 1.

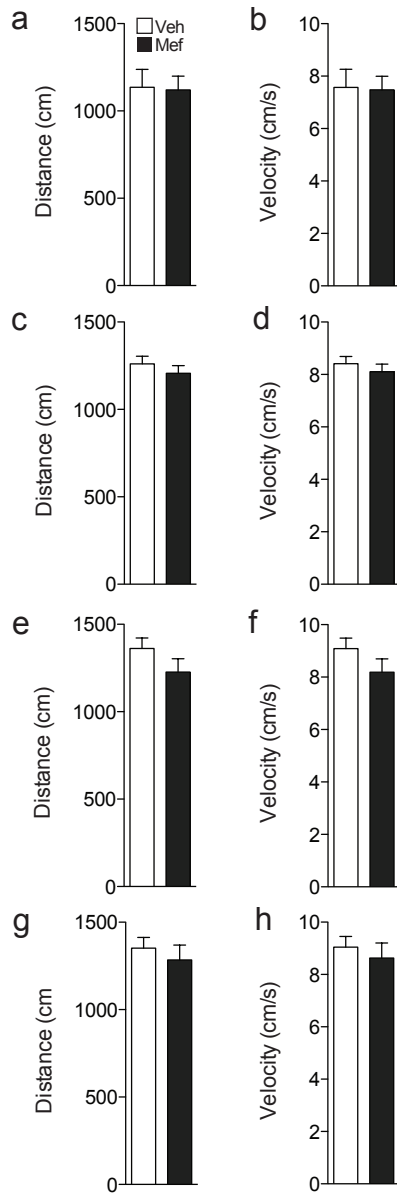

Supplement: NIHMS734354-supplement-1.pdf [file NIHMS734354-supplement-1.pdf]
